# Supplementary material for: Mucosal-Associated Invariant T Cell Features and TCR Repertoire Characteristics During the Course of Multiple Sclerosis
Source: PubMed Central journal article supplement (PMC6880779; doi:10.3389/fimmu.2019.02690), 2019-11-20
Supplement: Image_1.pdf [file Image_1.pdf]

Supplementary figure S1

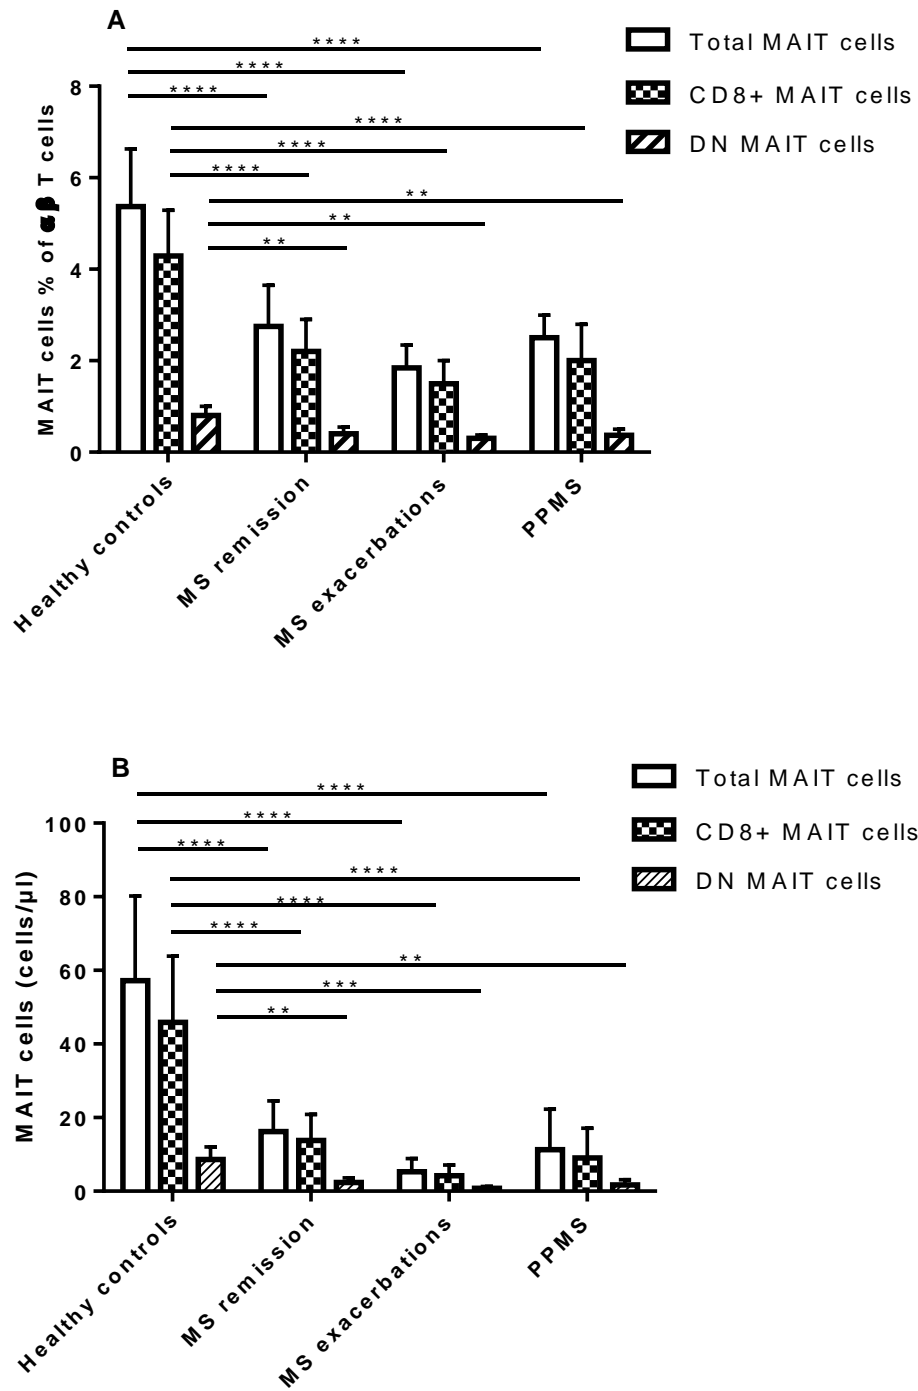

Data are presented as mean values  $\pm$  SEM from seven different experiments. Statistical analysis was performed using the Wilcoxon matched-pairs signed rank test. \*\* $p < 0.01$ , \*\*\* $p < 0.001$ , \*\*\*\* $p < 0.0001$ .
