# Supplementary material for: Mucosal-Associated Invariant T Cell Features and TCR Repertoire Characteristics During the Course of Multiple Sclerosis
Source: PubMed Central journal article supplement (PMC6880779; doi:10.3389/fimmu.2019.02690), 2019-11-20

Supplementary figure S2

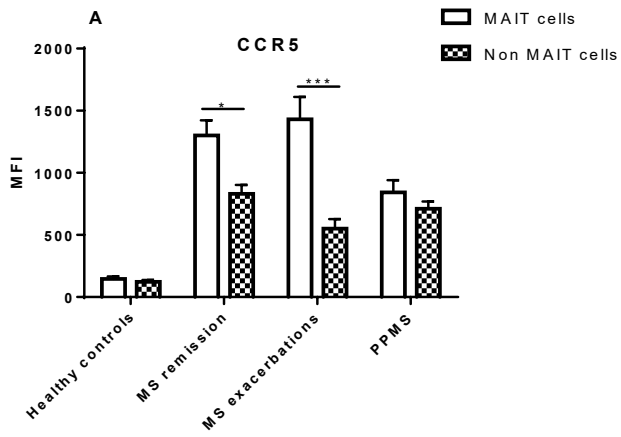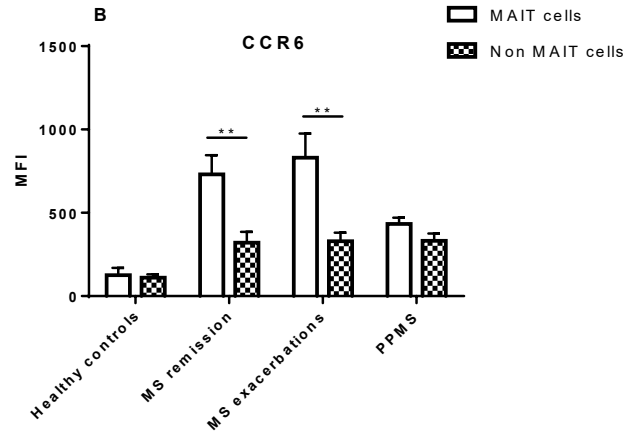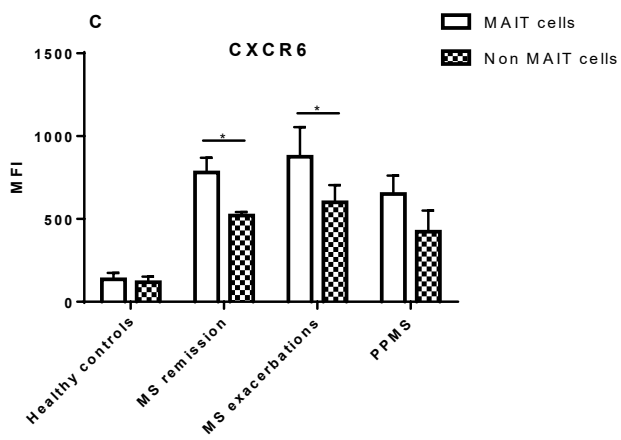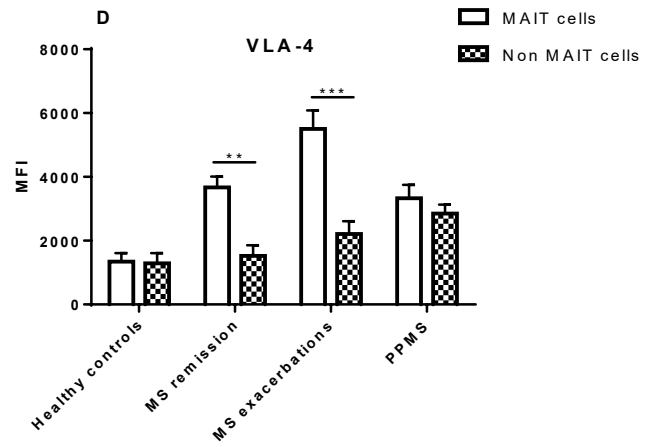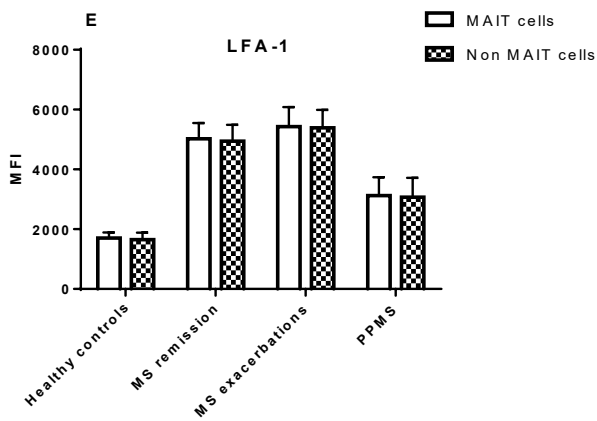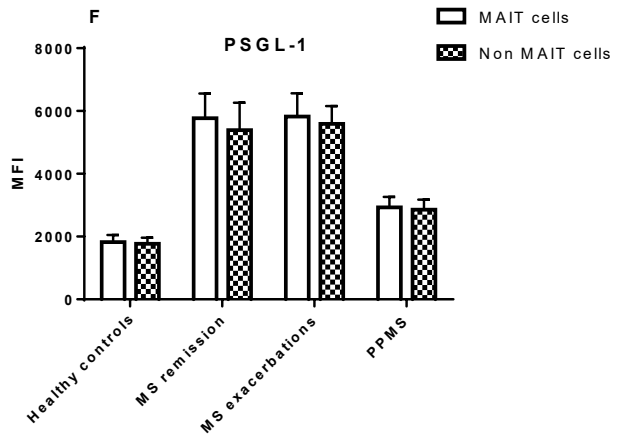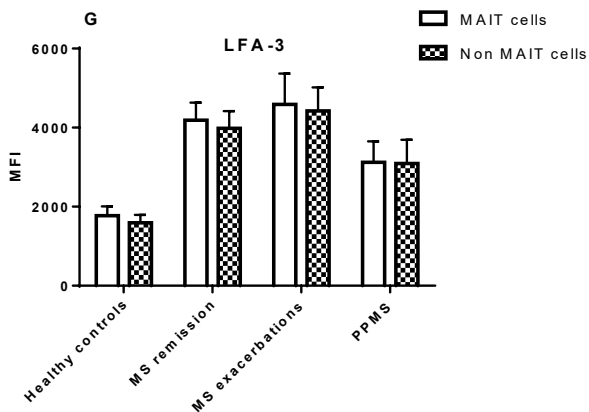

Supplement: Image_2.pdf [file Image_2.pdf]
